# Supplementary material for: Construction of WO3–g-C3N4 composites as efficient photocatalysts for pharmaceutical degradation under visible light
Source: Royal Society of Chemistry journal article supplement (doi:10.1039/c7cy00529f), 2017-01-01
Supplement: c7cy00529f1.pdf [file c7cy00529f1.pdf]

**Construction of WO<sub>3</sub>-g-C<sub>3</sub>N<sub>4</sub> composites as efficient photocatalysts for  
pharmaceutical degradation under visible light**

Wenyu Zhu<sup>a,b</sup>, Faqian Sun<sup>a</sup>, Ronn Goei<sup>b</sup>, Yan Zhou<sup>a,b\*</sup>

a. School of Civil and Environmental Engineering, Nanyang Technological University, 50 Nanyang Avenue, Singapore 639798, Republic of Singapore

b. Nanyang Environment and Water Research Institute (NEWRI), 1 Cleantech Loop, CleanTech One, Singapore 637141, Republic of Singapore

\* Corresponding author: zhouyan@ntu.edu.sg

**HPLC operation**

The samples were filtered with 0.45 μm cellulose acetate syringe membrane filter to determine the SMX concentration via ultra-fast liquid chromatography (UFLC) with a Agilent Proshell 120 EC-C 18 column (4.1 × 100 mm, 2.7 μm) and an SPD-M20A diode array detector using a Shimadzu LC system (LC-20AD, Japan). The mobile phases consisted of water (A) and 10 mM ammonium acetate in methanol (B) with 0.1% formic acid. The gradient elution was: 0-0.5 min, 10% B; 0.5-1 min, 10-40% B; 9.0-13 min, 90% A; from 13 to 13.10 to return to the initial conditions and finally from 13.10 to 22 min equilibration of the column. The flow rate and injection volume were 0.8 mL/min and 5 μL, respectively. The detector wavelength was set at 270 nm. The retention time of SMX was 7.5 min.

**Fig. S1** The SMX structures at different pH values:  $pK_{a1}=1.7$  and  $pK_{a2}=5.6$ .

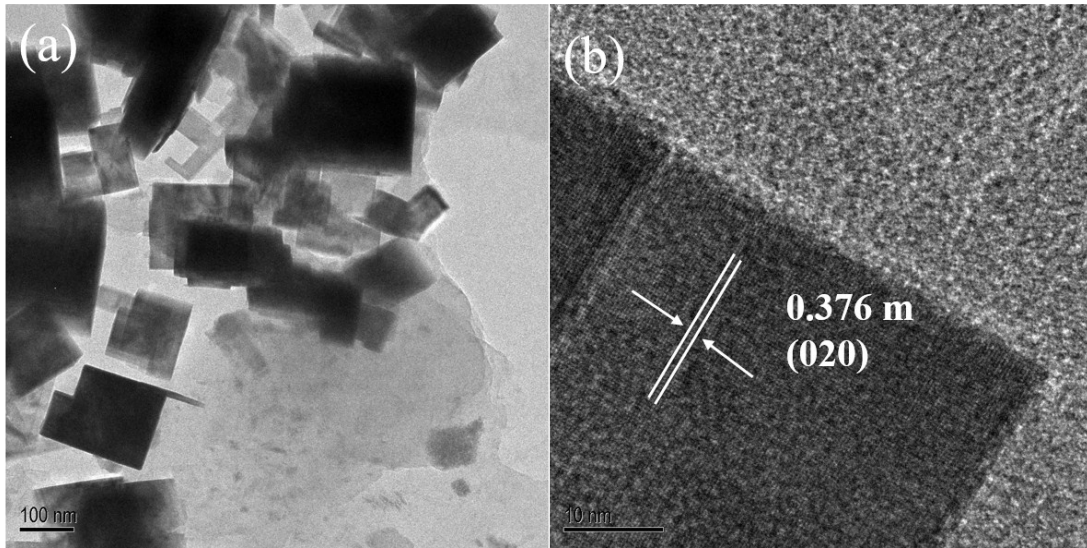

Fig. S2 TEM images of WCN-8 at different magnification: low magnification (a) and high resolution (b)

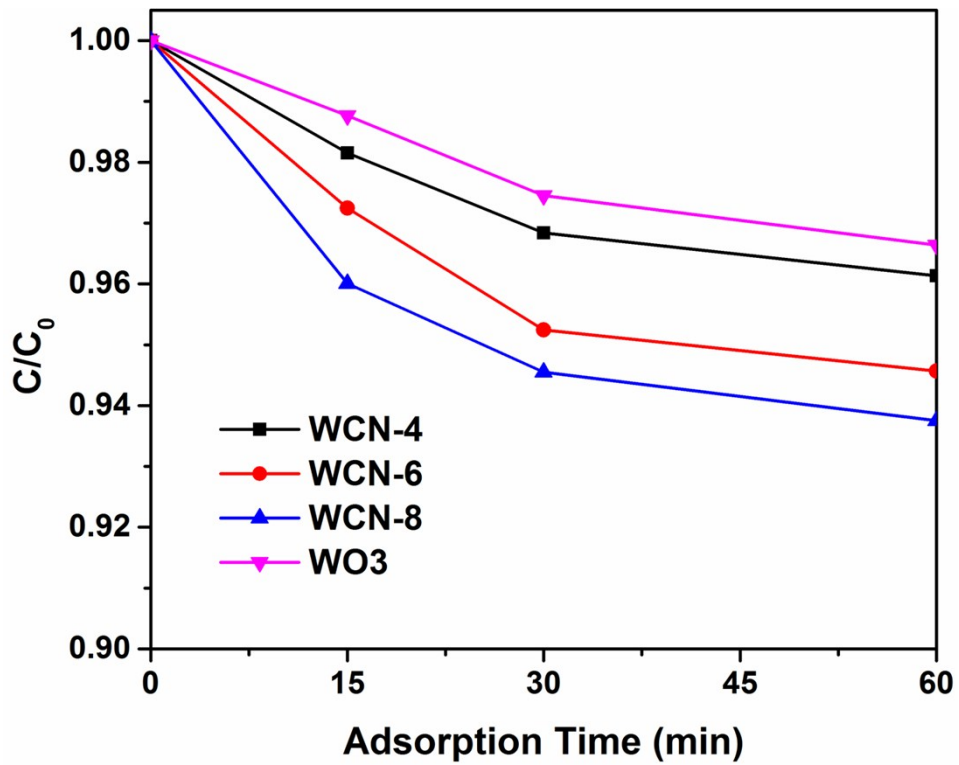

Fig. S3 SMX adsorption on different catalyst within 60 min.

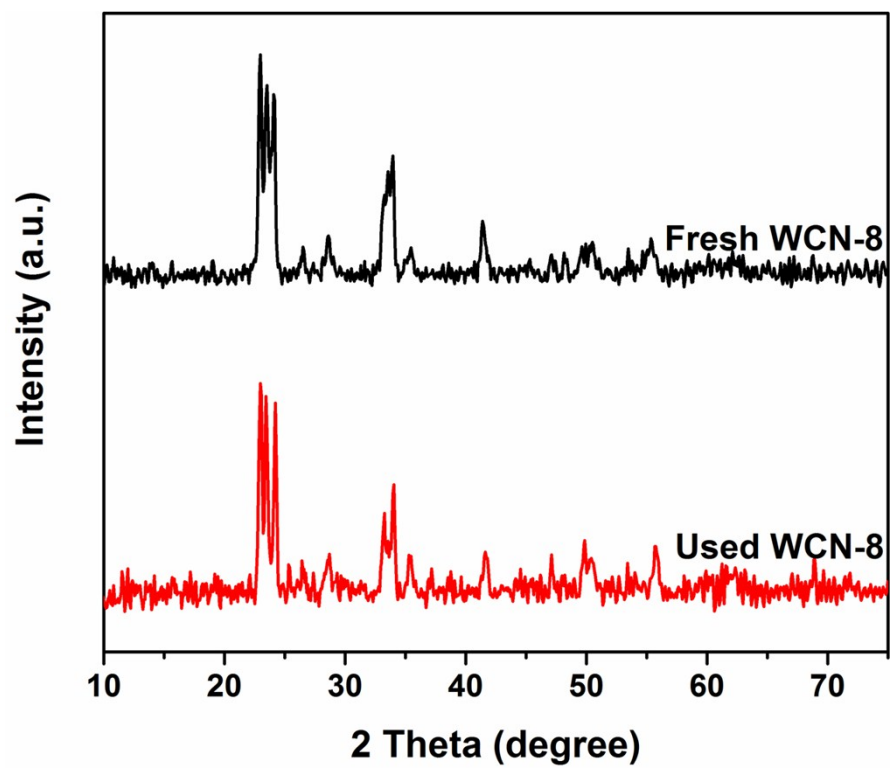

Fig. S4 XRD spectra comparison between fresh WCN-8 and used WCN-8.
